# Supplementary material
Source: publisher site journal article supplement (https://www.degruyterbrill.com/publication/isbn/9783110279771/downloadAsset/9783110279771_Inhaltsverzeichnis.pdf)
Supplement: Supplementary file 1 [file 9783110279771_Inhaltsverzeichnis.pdf]

# Table of contents

Acknowledgements — vii

Preface — ix

List of Contributors — xi

Maps — xiii

## 1 Traditional Indigenous languages of Australia

Harold Koch and Rachel Nordlinger

### 1 The languages of Australia in linguistic research: context and issues — 3

Harold Koch

### 2 Historical relations among the Australian languages: genetic classification and contact-based diffusion — 23

Janet Fletcher and Andrew Butcher

### 3 Sound patterns of Australian languages — 91

Brett Baker

### 4 Word structure in Australian languages — 139

Rachel Nordlinger

### 5 Constituency and grammatical relations in Australian languages — 215

Claire Bowern

### 6 Complex predicates in Australian languages — 263

Alice Gaby and Ruth Singer

### 7 Semantics of Australian languages — 295

Michael Walsh

### 8 Indigenous language maintenance and revitalisation — 329

## **2 Post-Contact language varieties**

Felicity Meakins

### **9 Language contact varieties — 365**

Diana Eades

### **10 Aboriginal English — 417**

Peter Collins

### **11 Australian English — 449**

**Language Index — 485**

**Name Index — 491**

**Subject Index — 496**
